# Supplementary figures and images for: Structural design of cubic Sr,V:CeFeO3 thin films with a strong magneto-optical effect and high compatibility with a Si substrate
Source: Royal Society of Chemistry journal article supplement (doi:10.1039/c9dt04837e), 2020-01-01

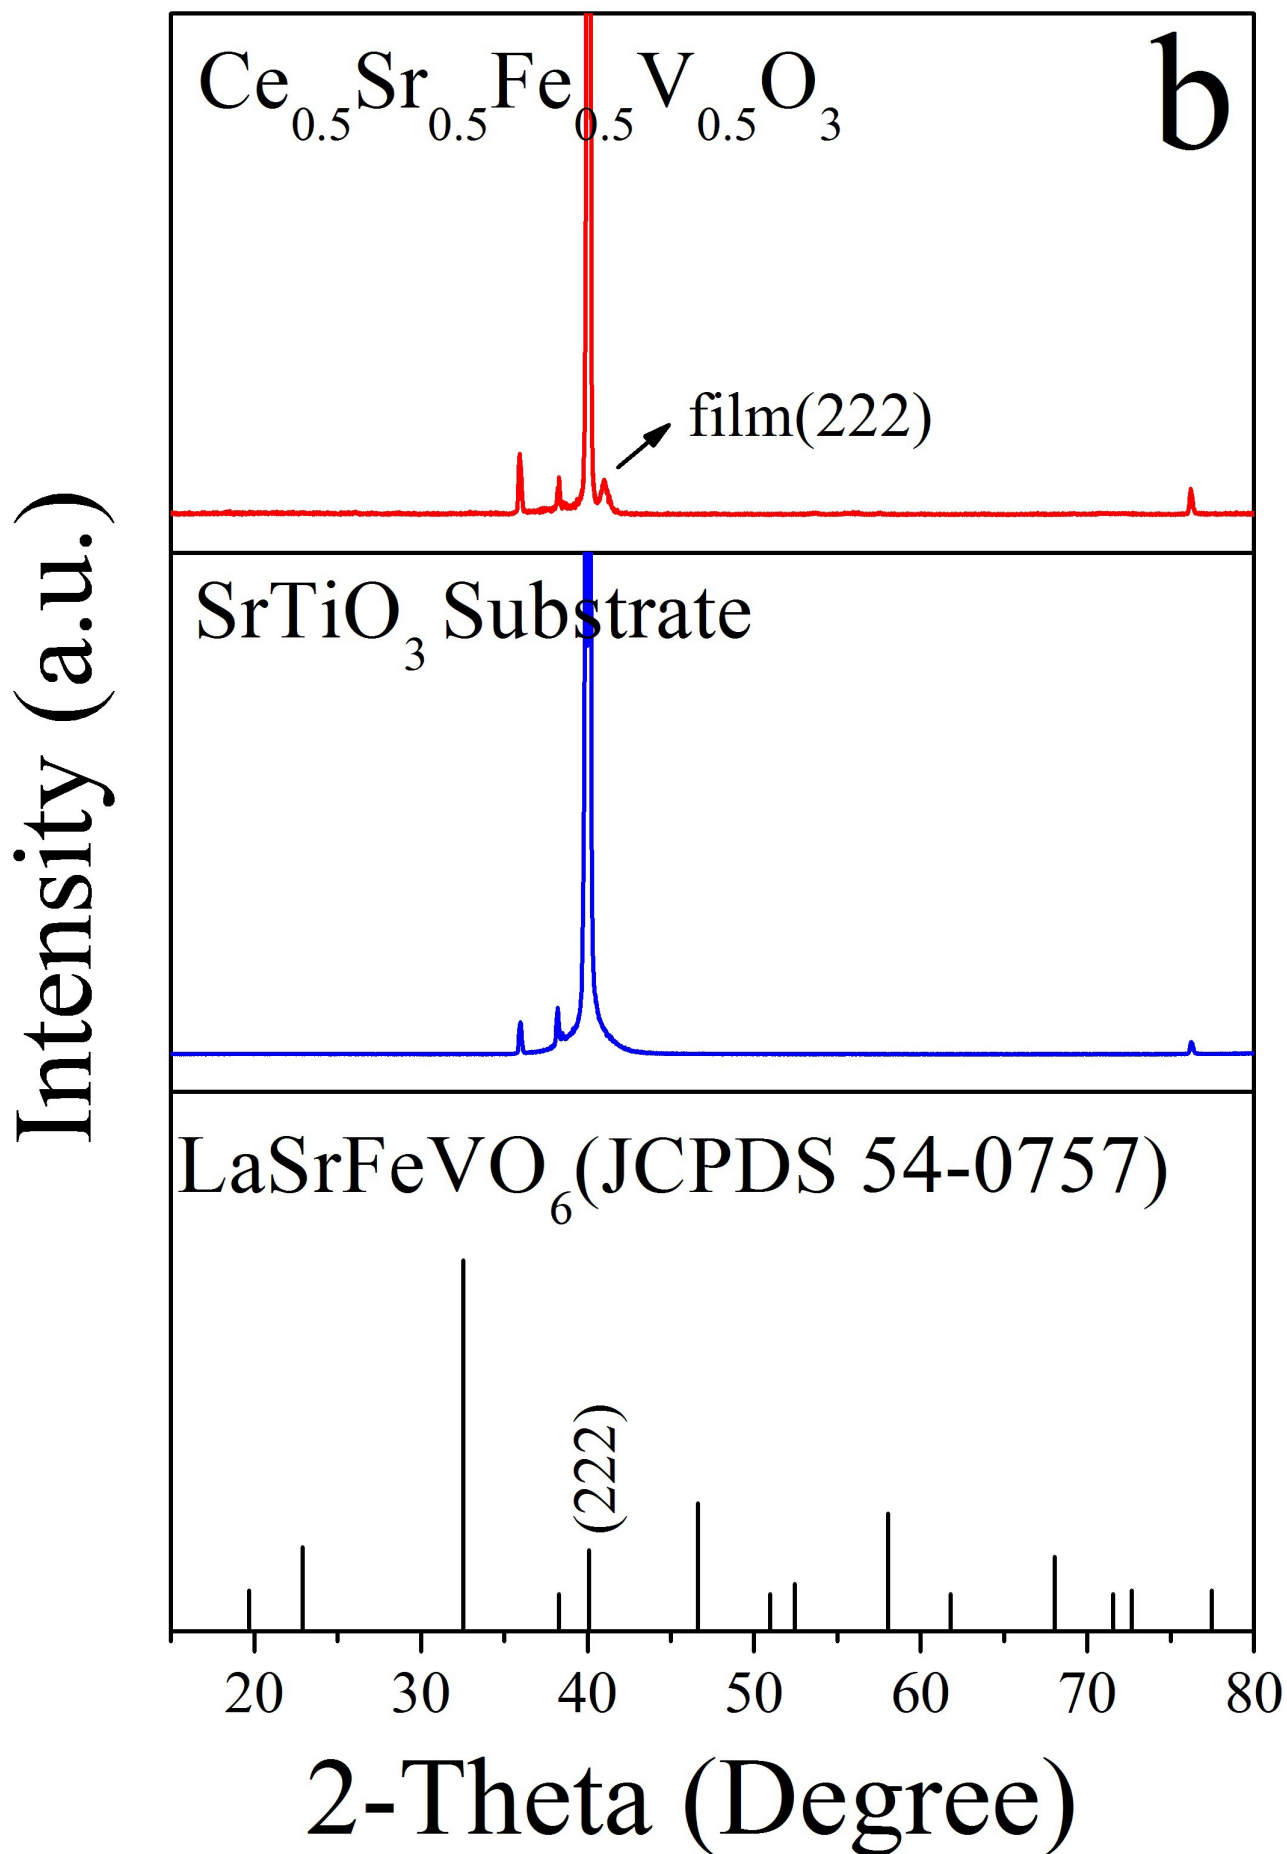

Supplement: c9dt04837e10.pdf [file c9dt04837e10.pdf]

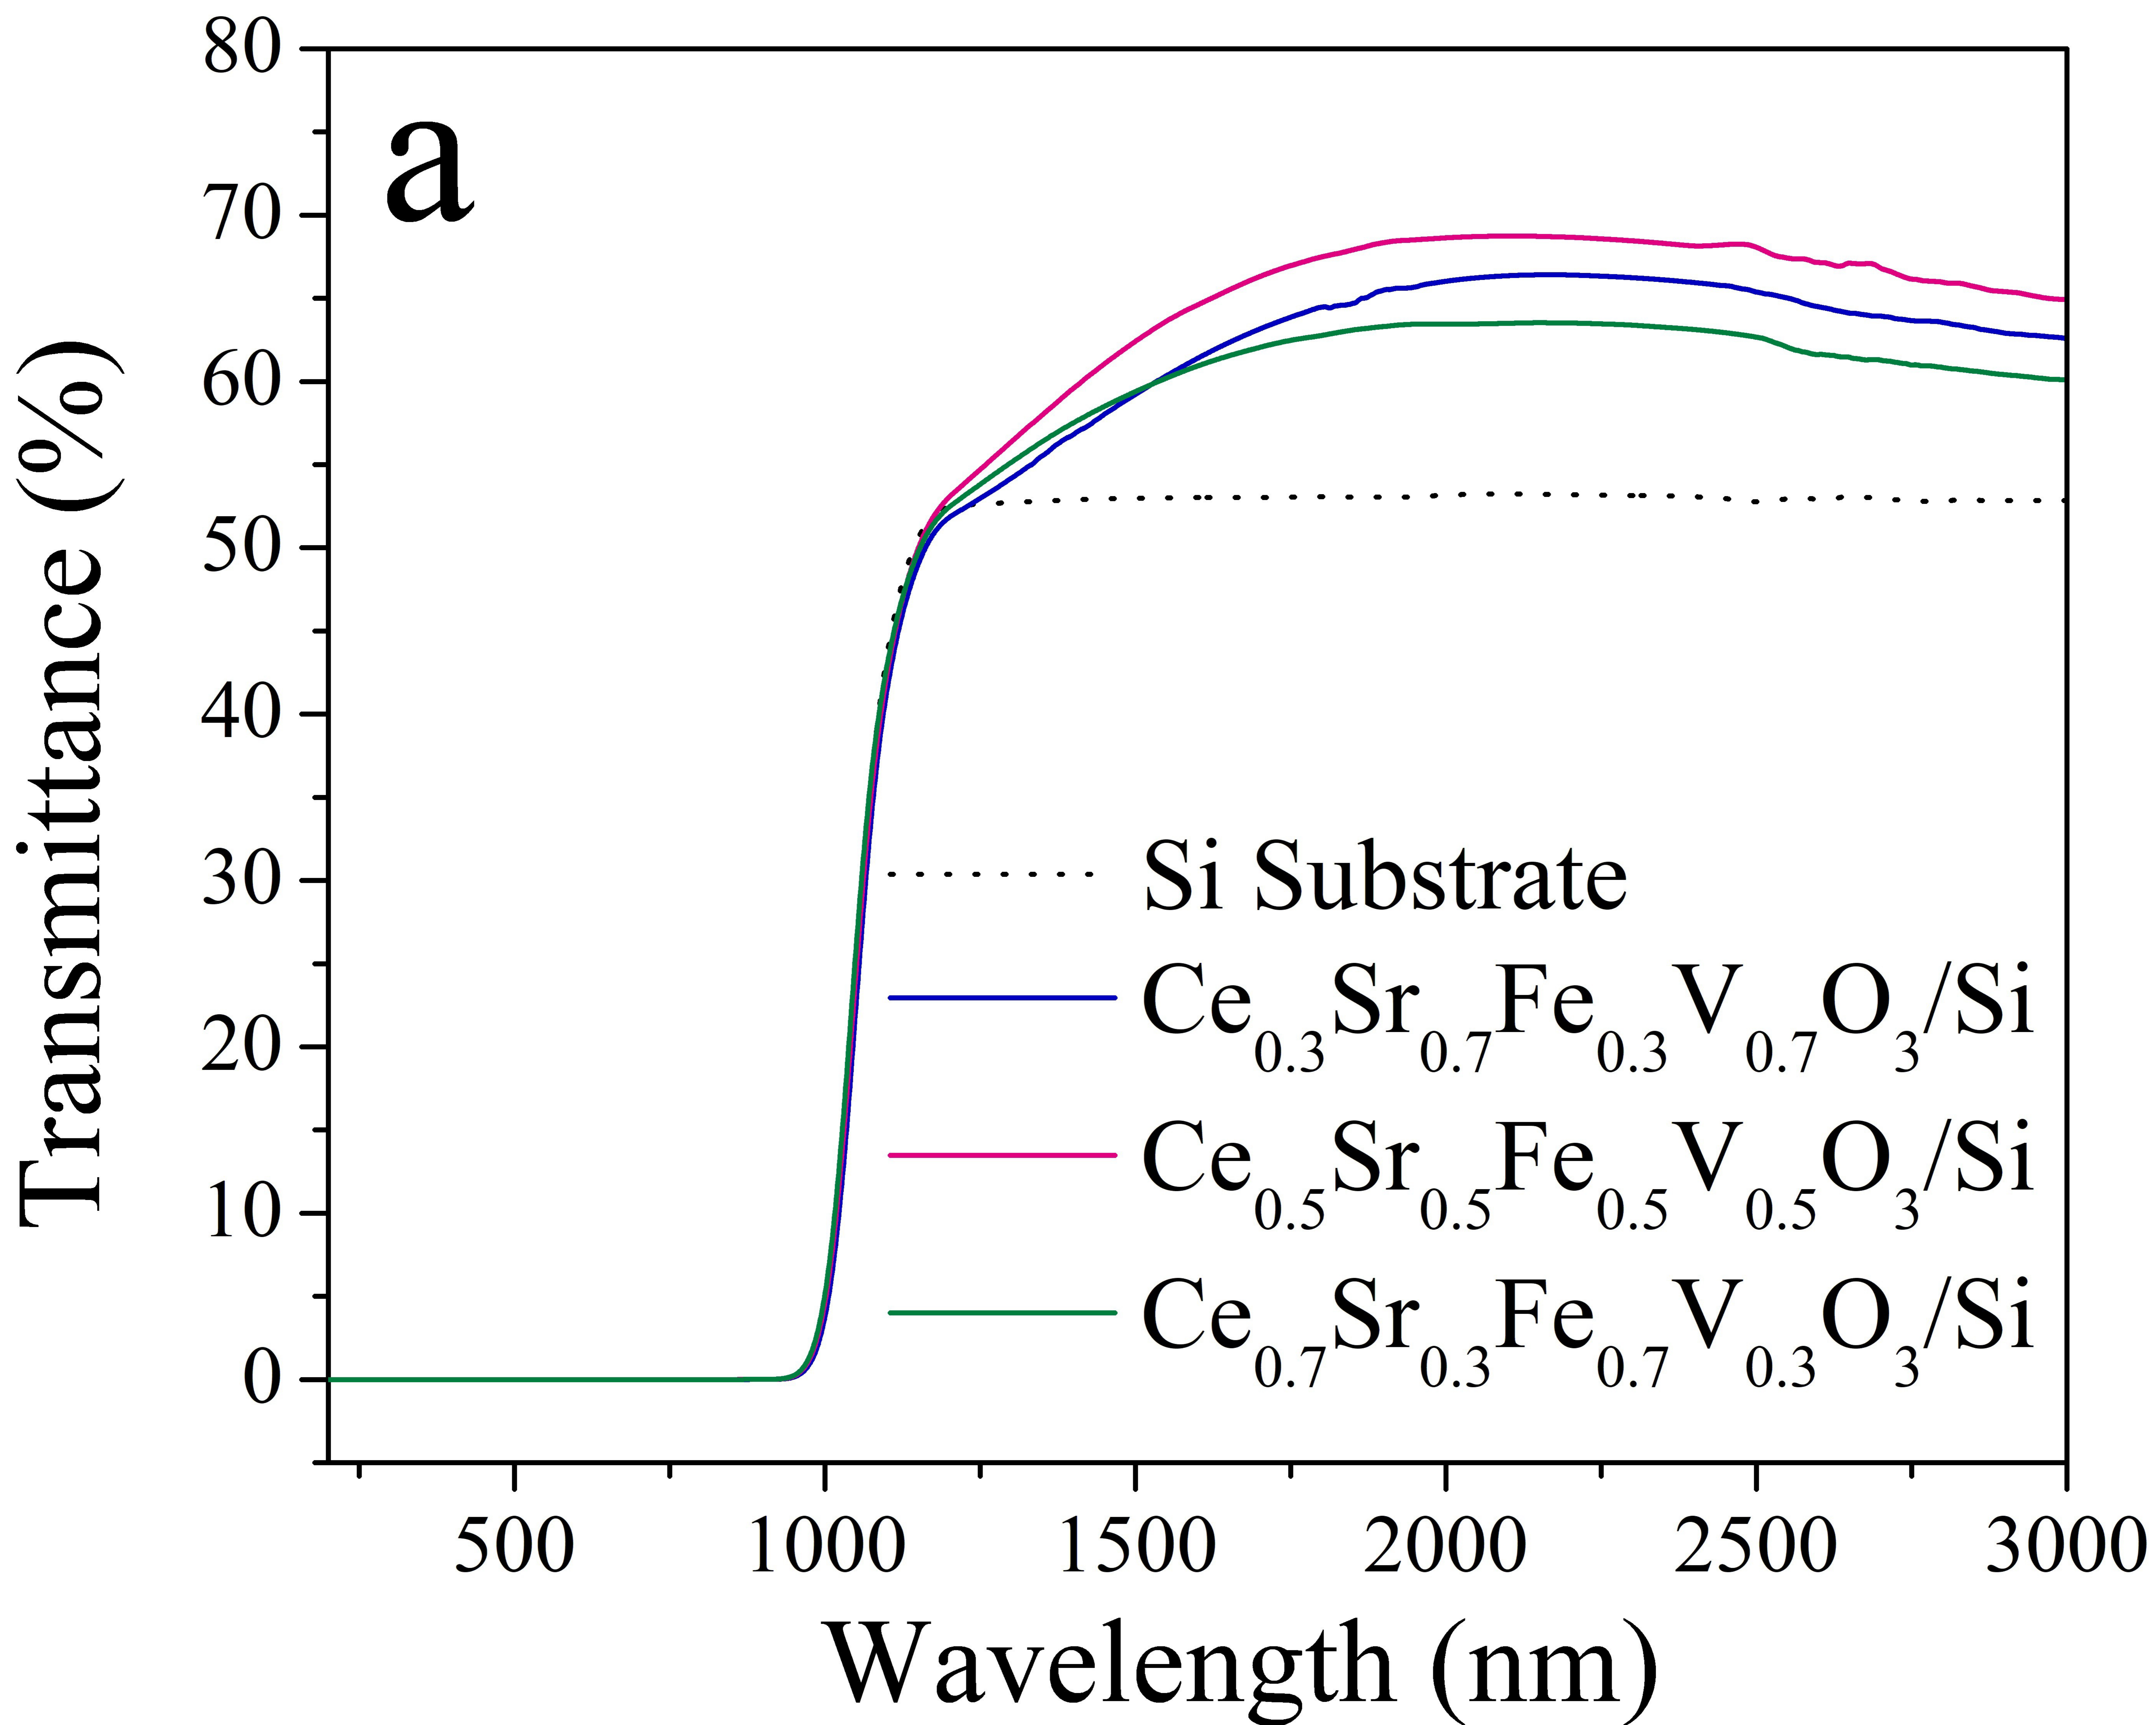

Supplement: c9dt04837e11.pdf [file c9dt04837e11.pdf]

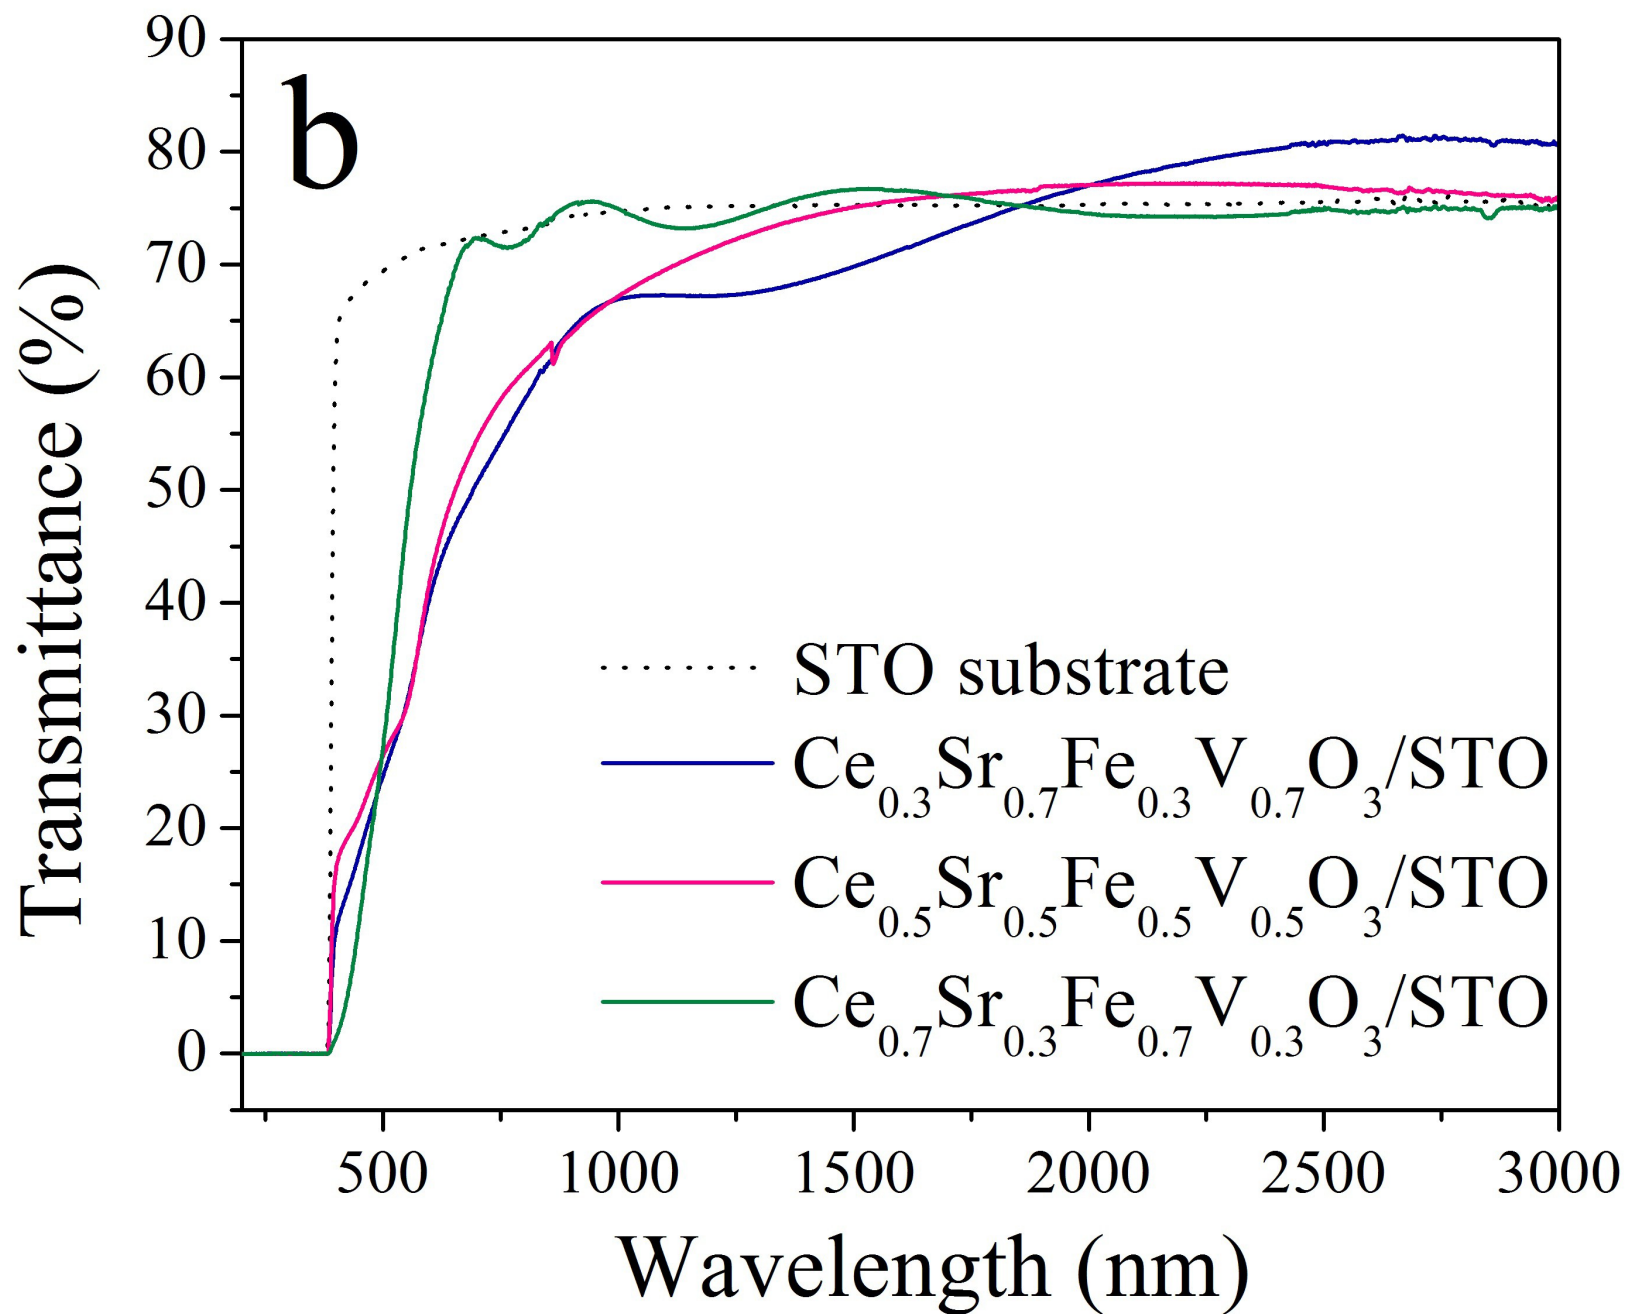

Supplement: c9dt04837e12.pdf [file c9dt04837e12.pdf]

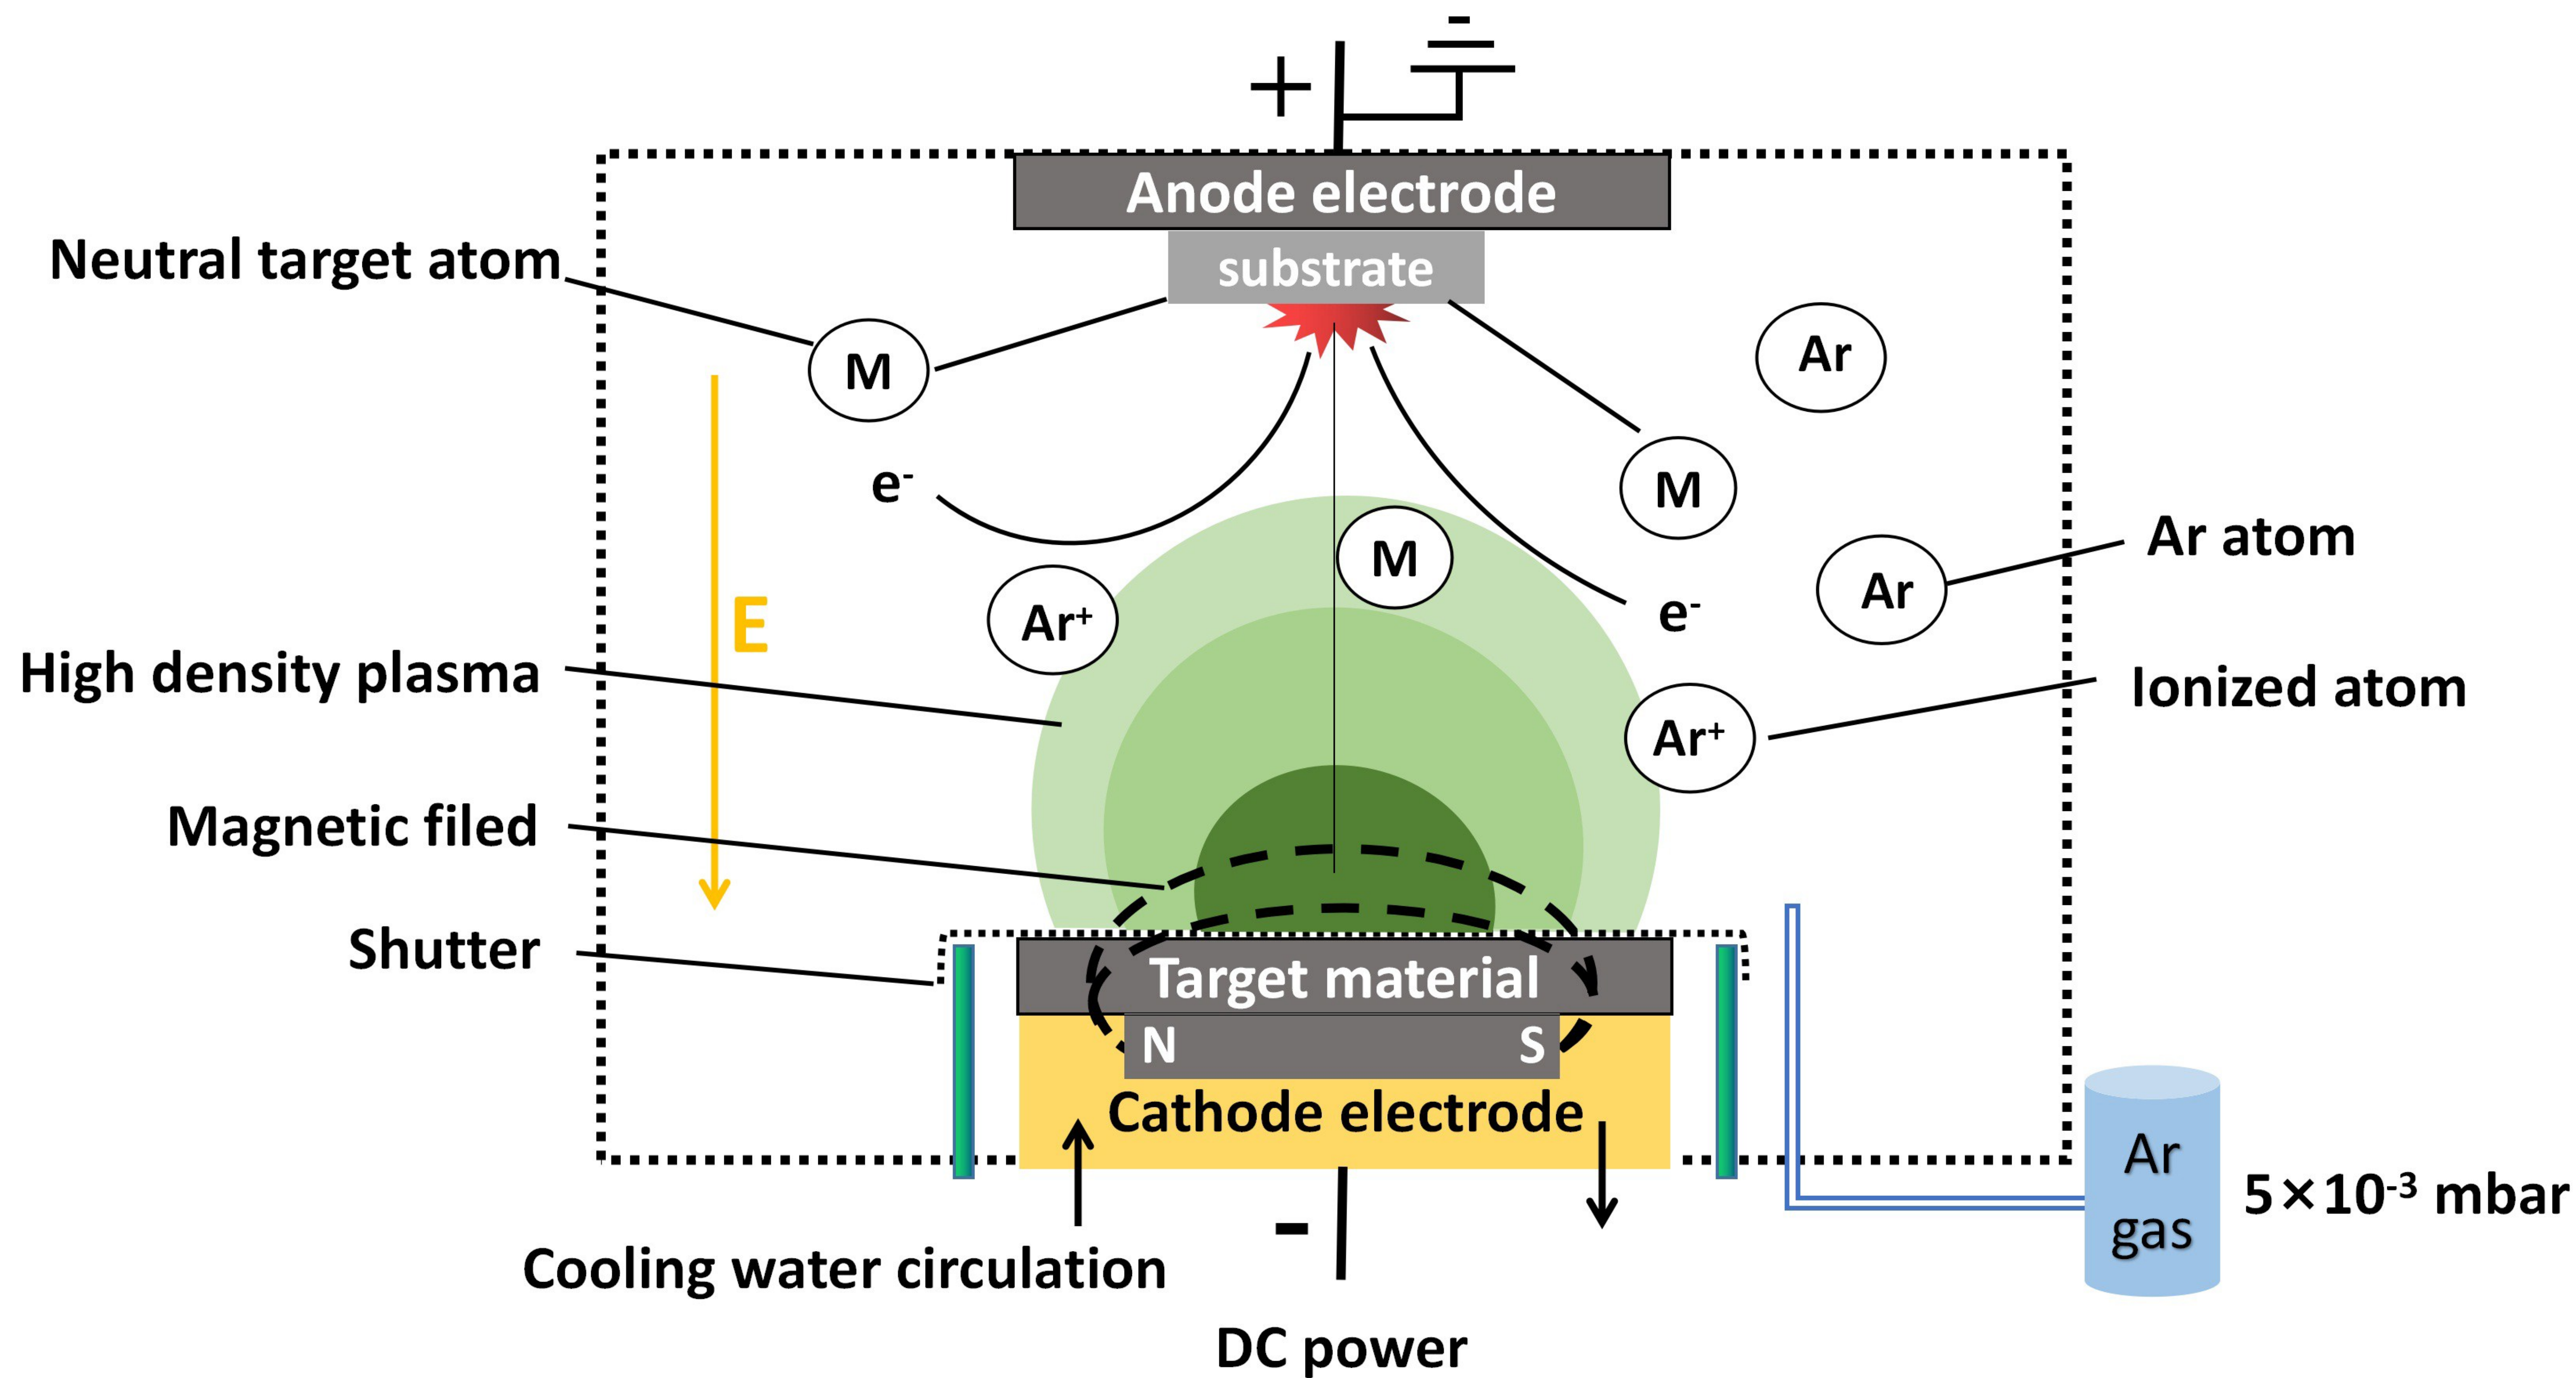

Supplement: c9dt04837e2.pdf [file c9dt04837e2.pdf]

a

349 nm

300 nm

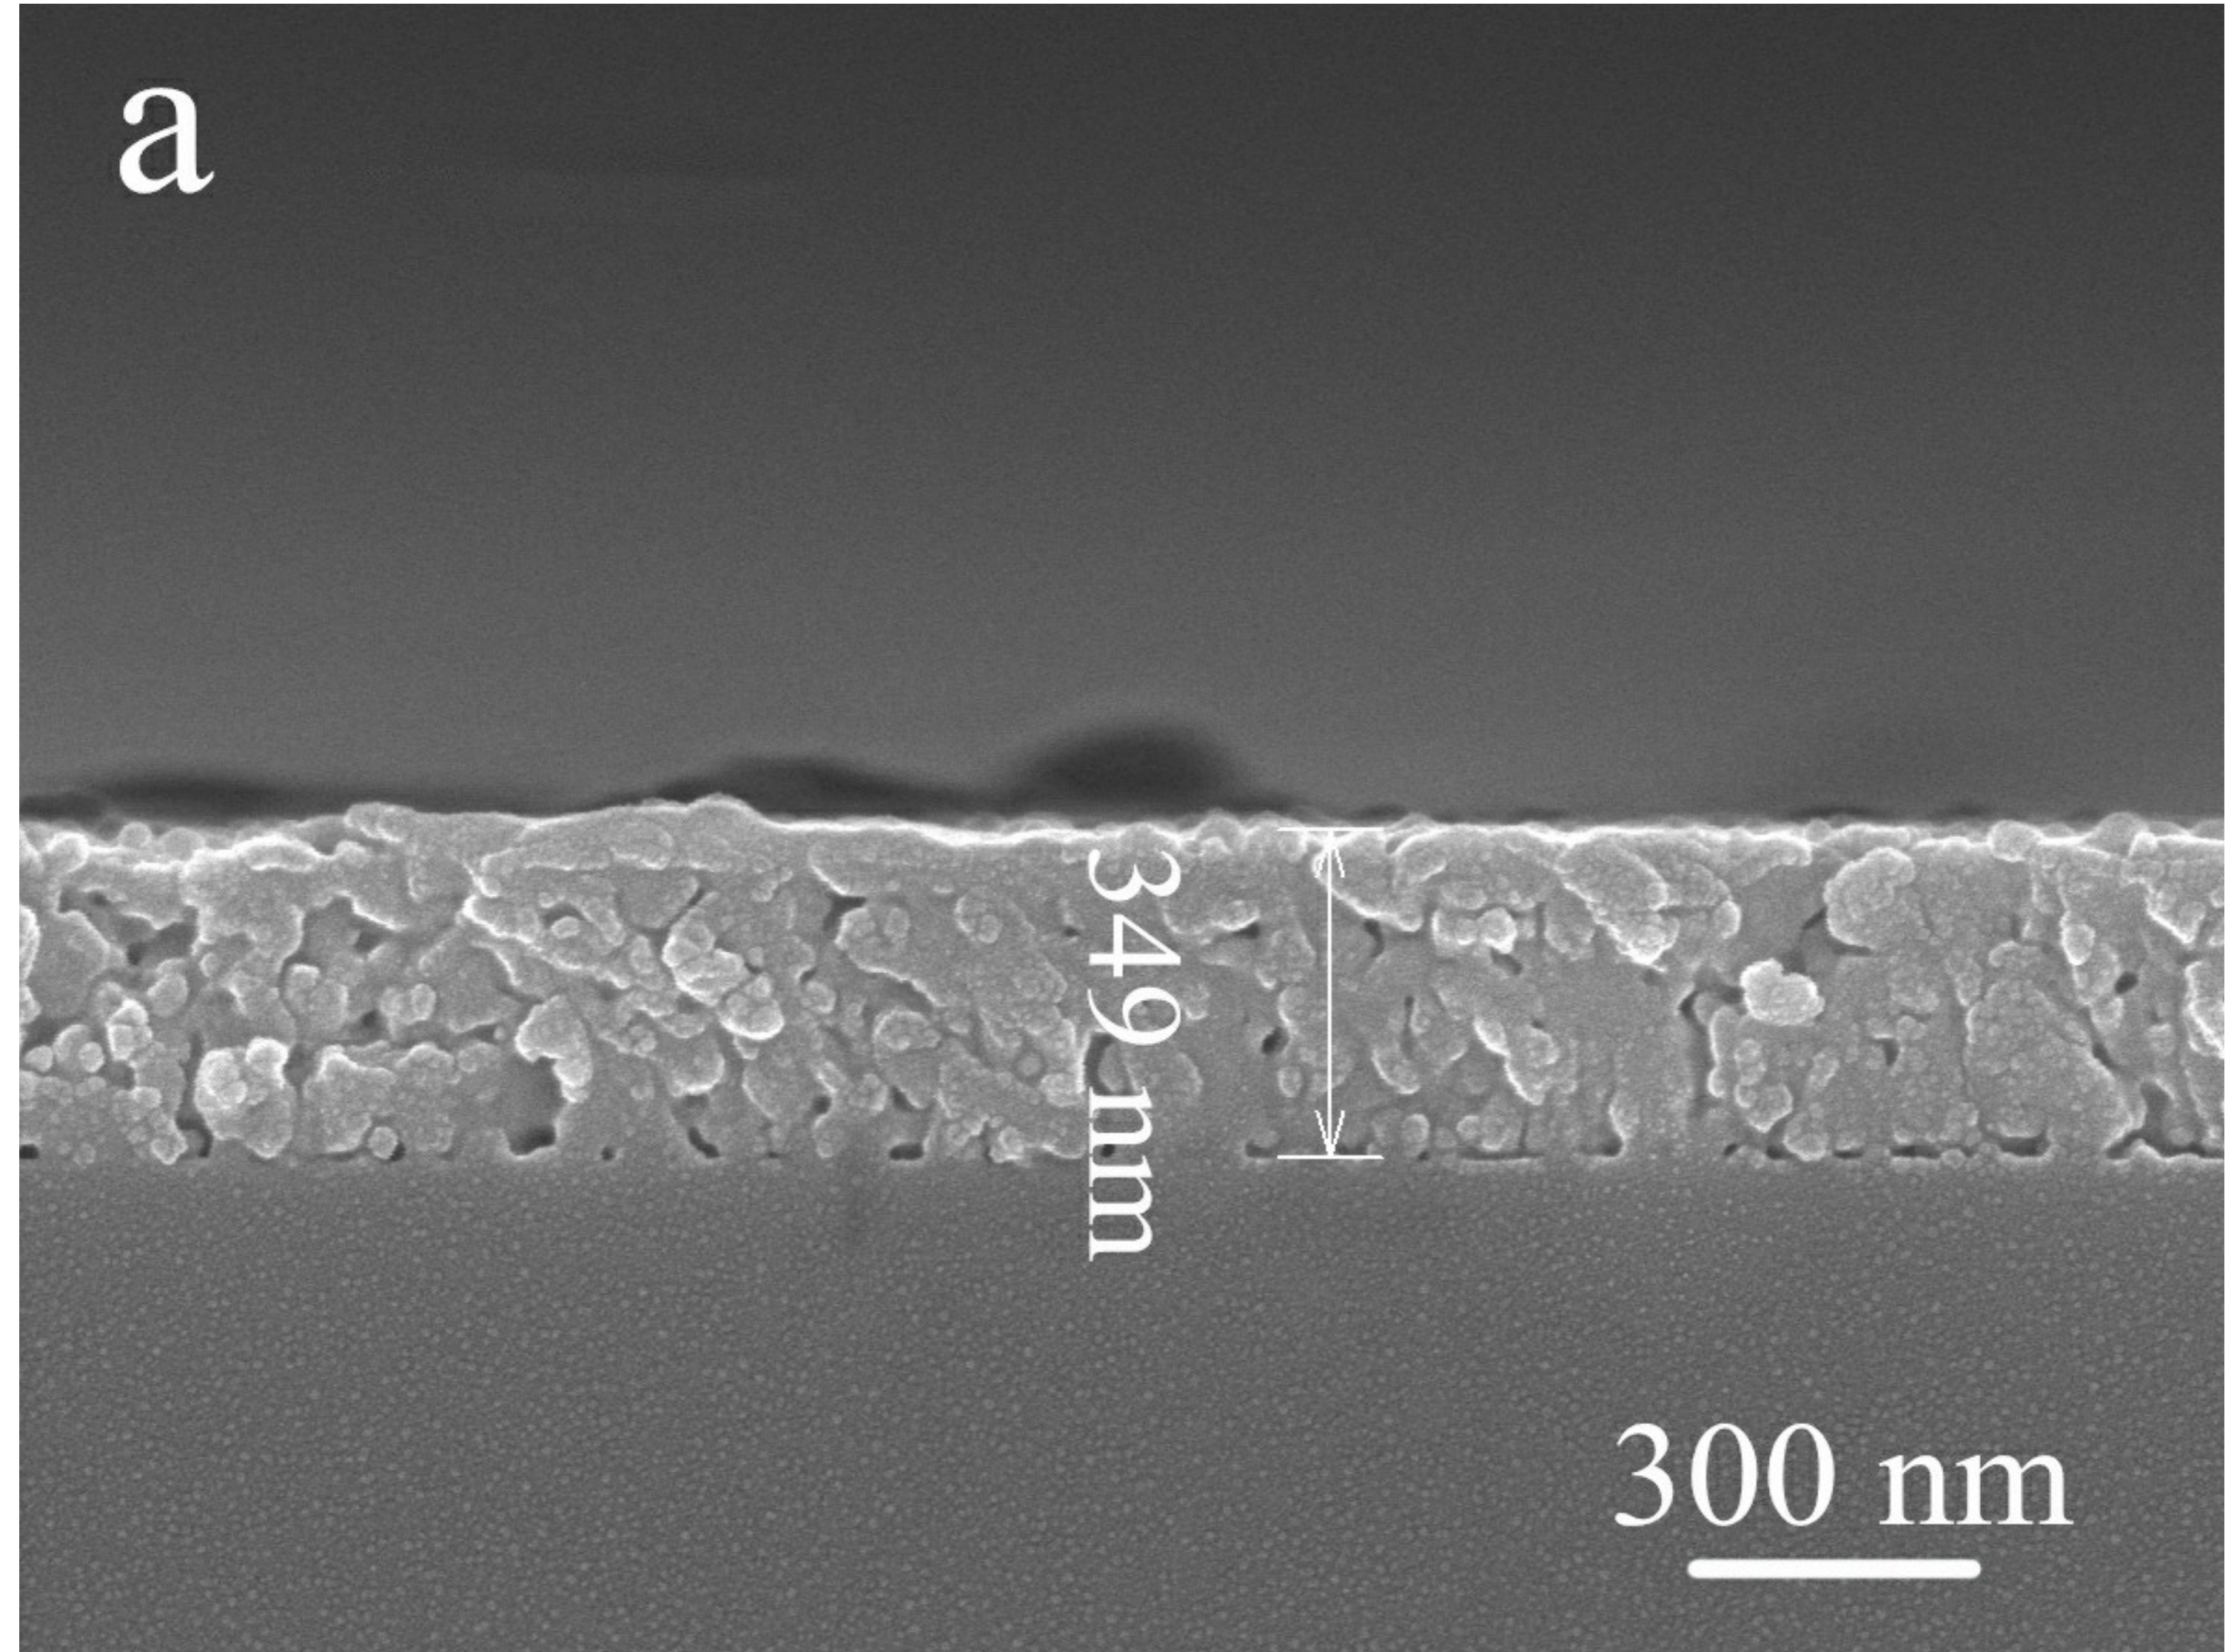

Supplement: c9dt04837e3.pdf [file c9dt04837e3.pdf]

b

578 nm

300 nm

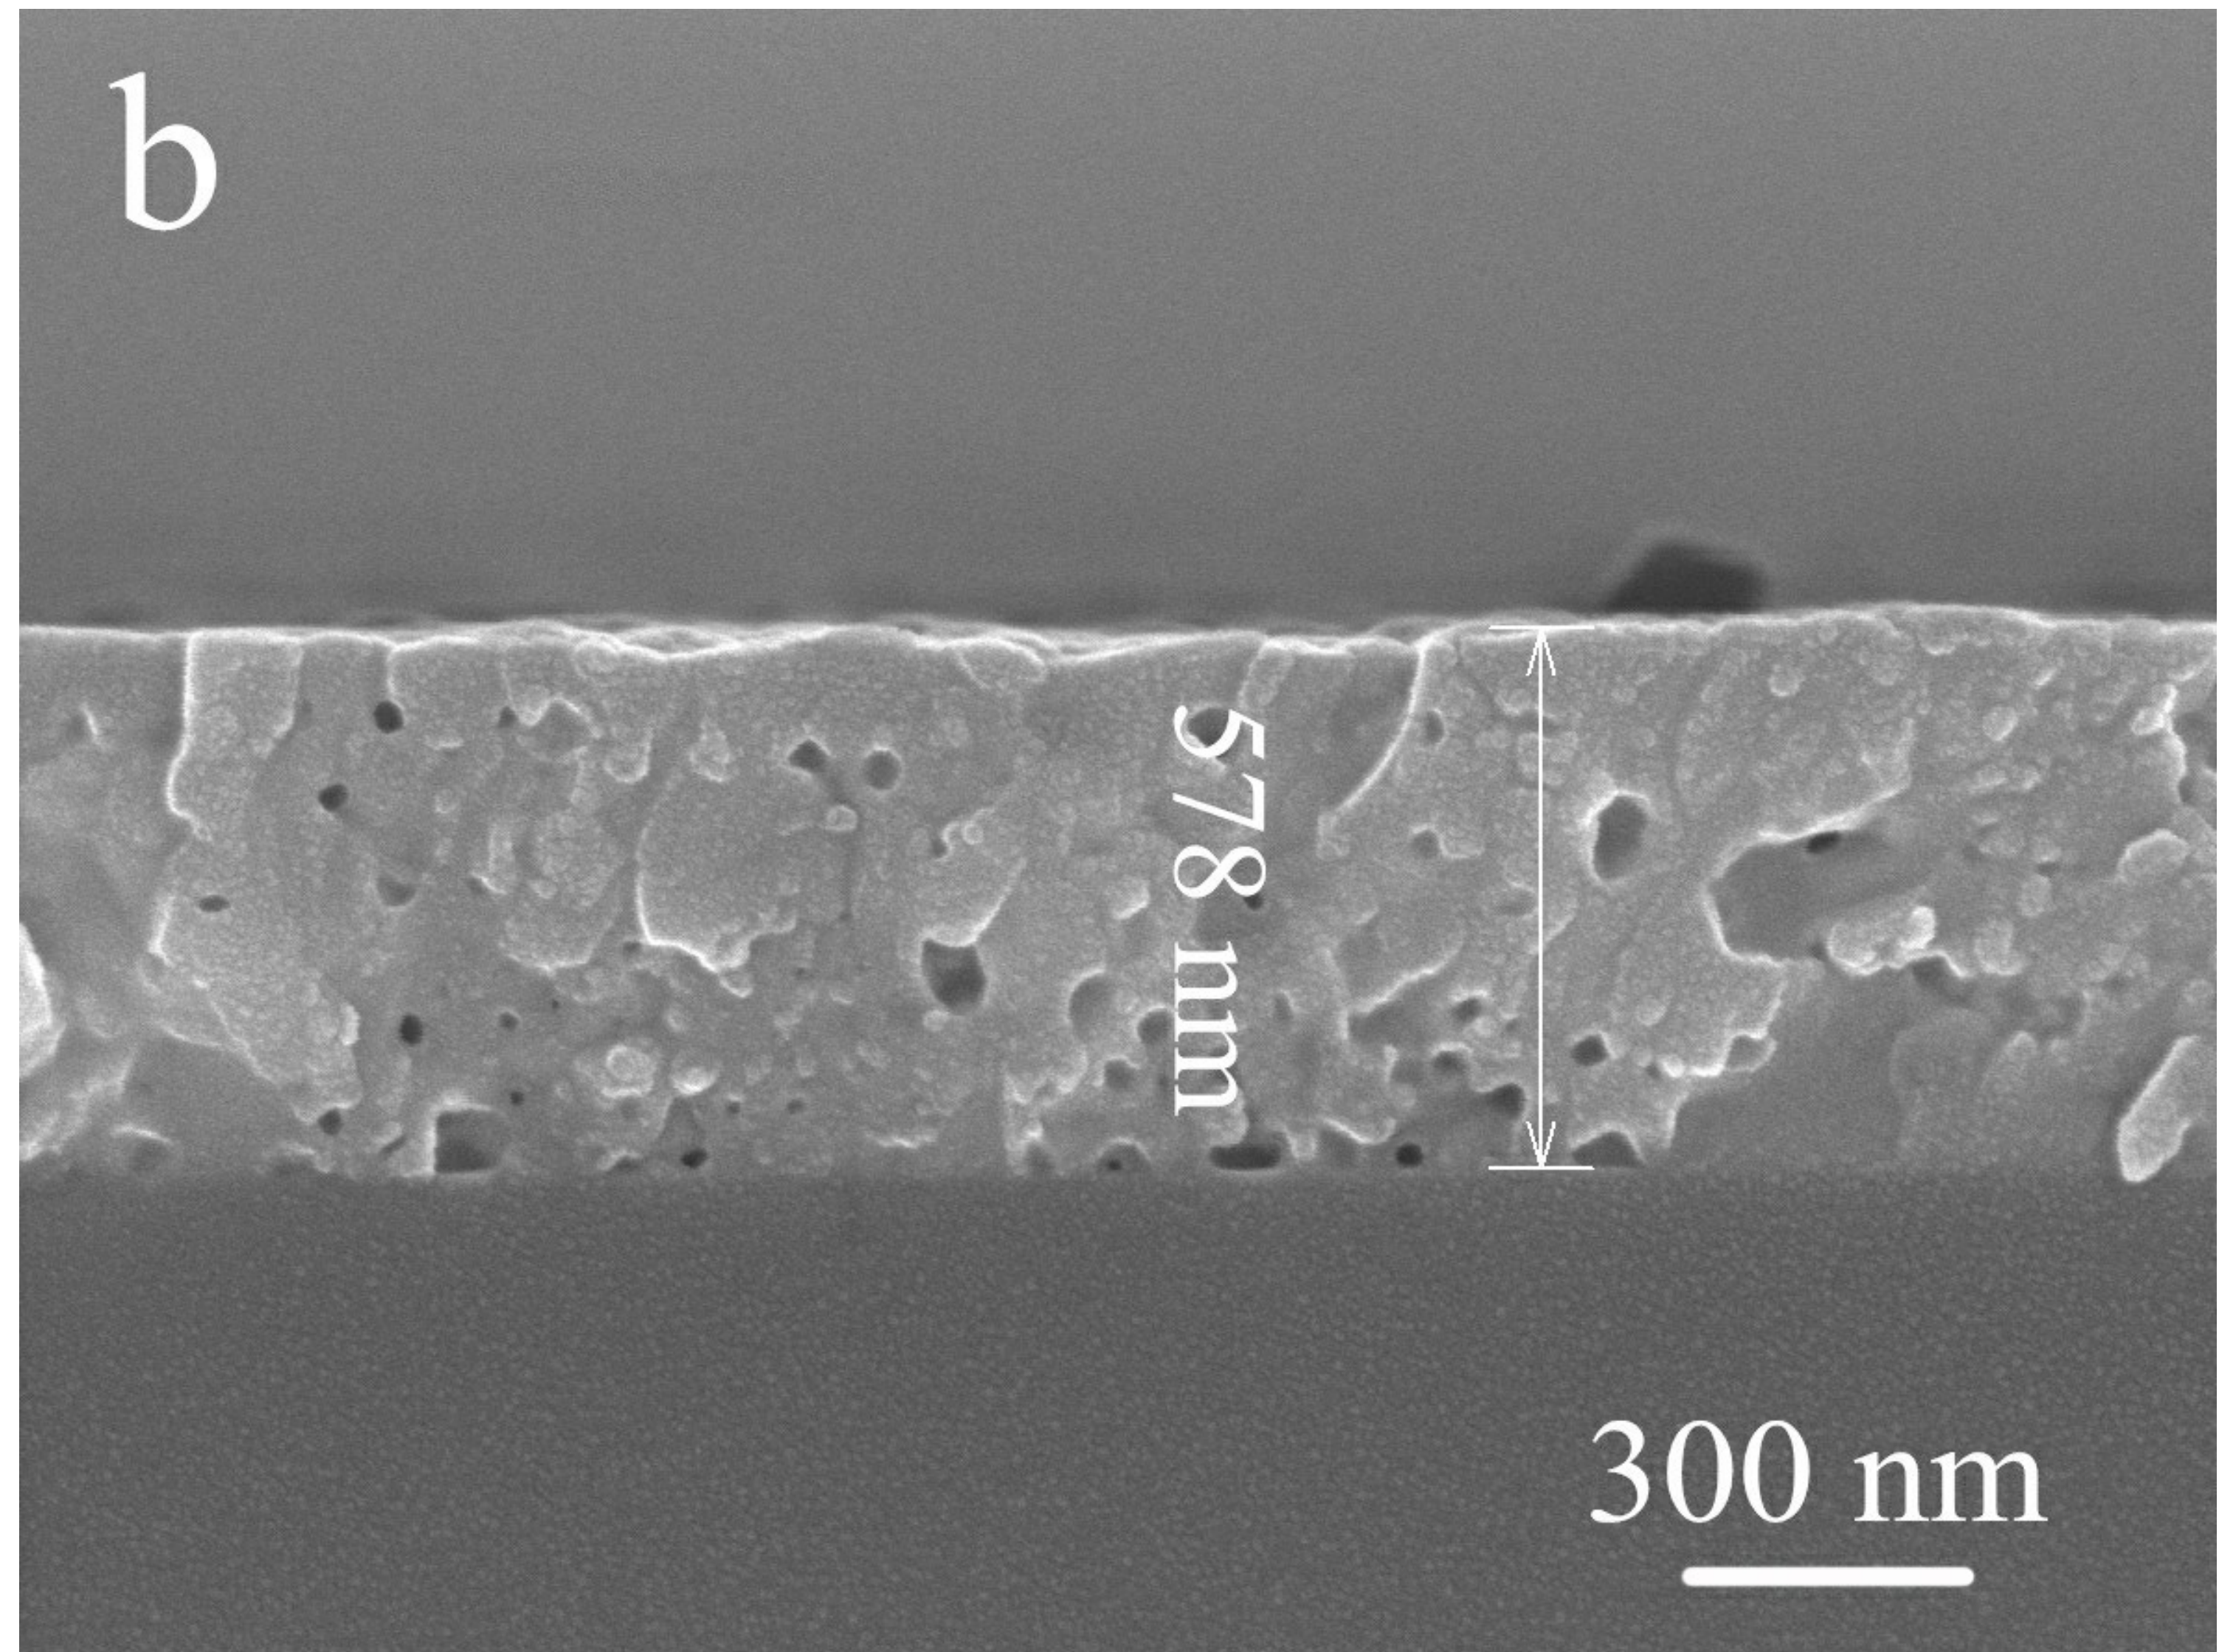

Supplement: c9dt04837e4.pdf [file c9dt04837e4.pdf]

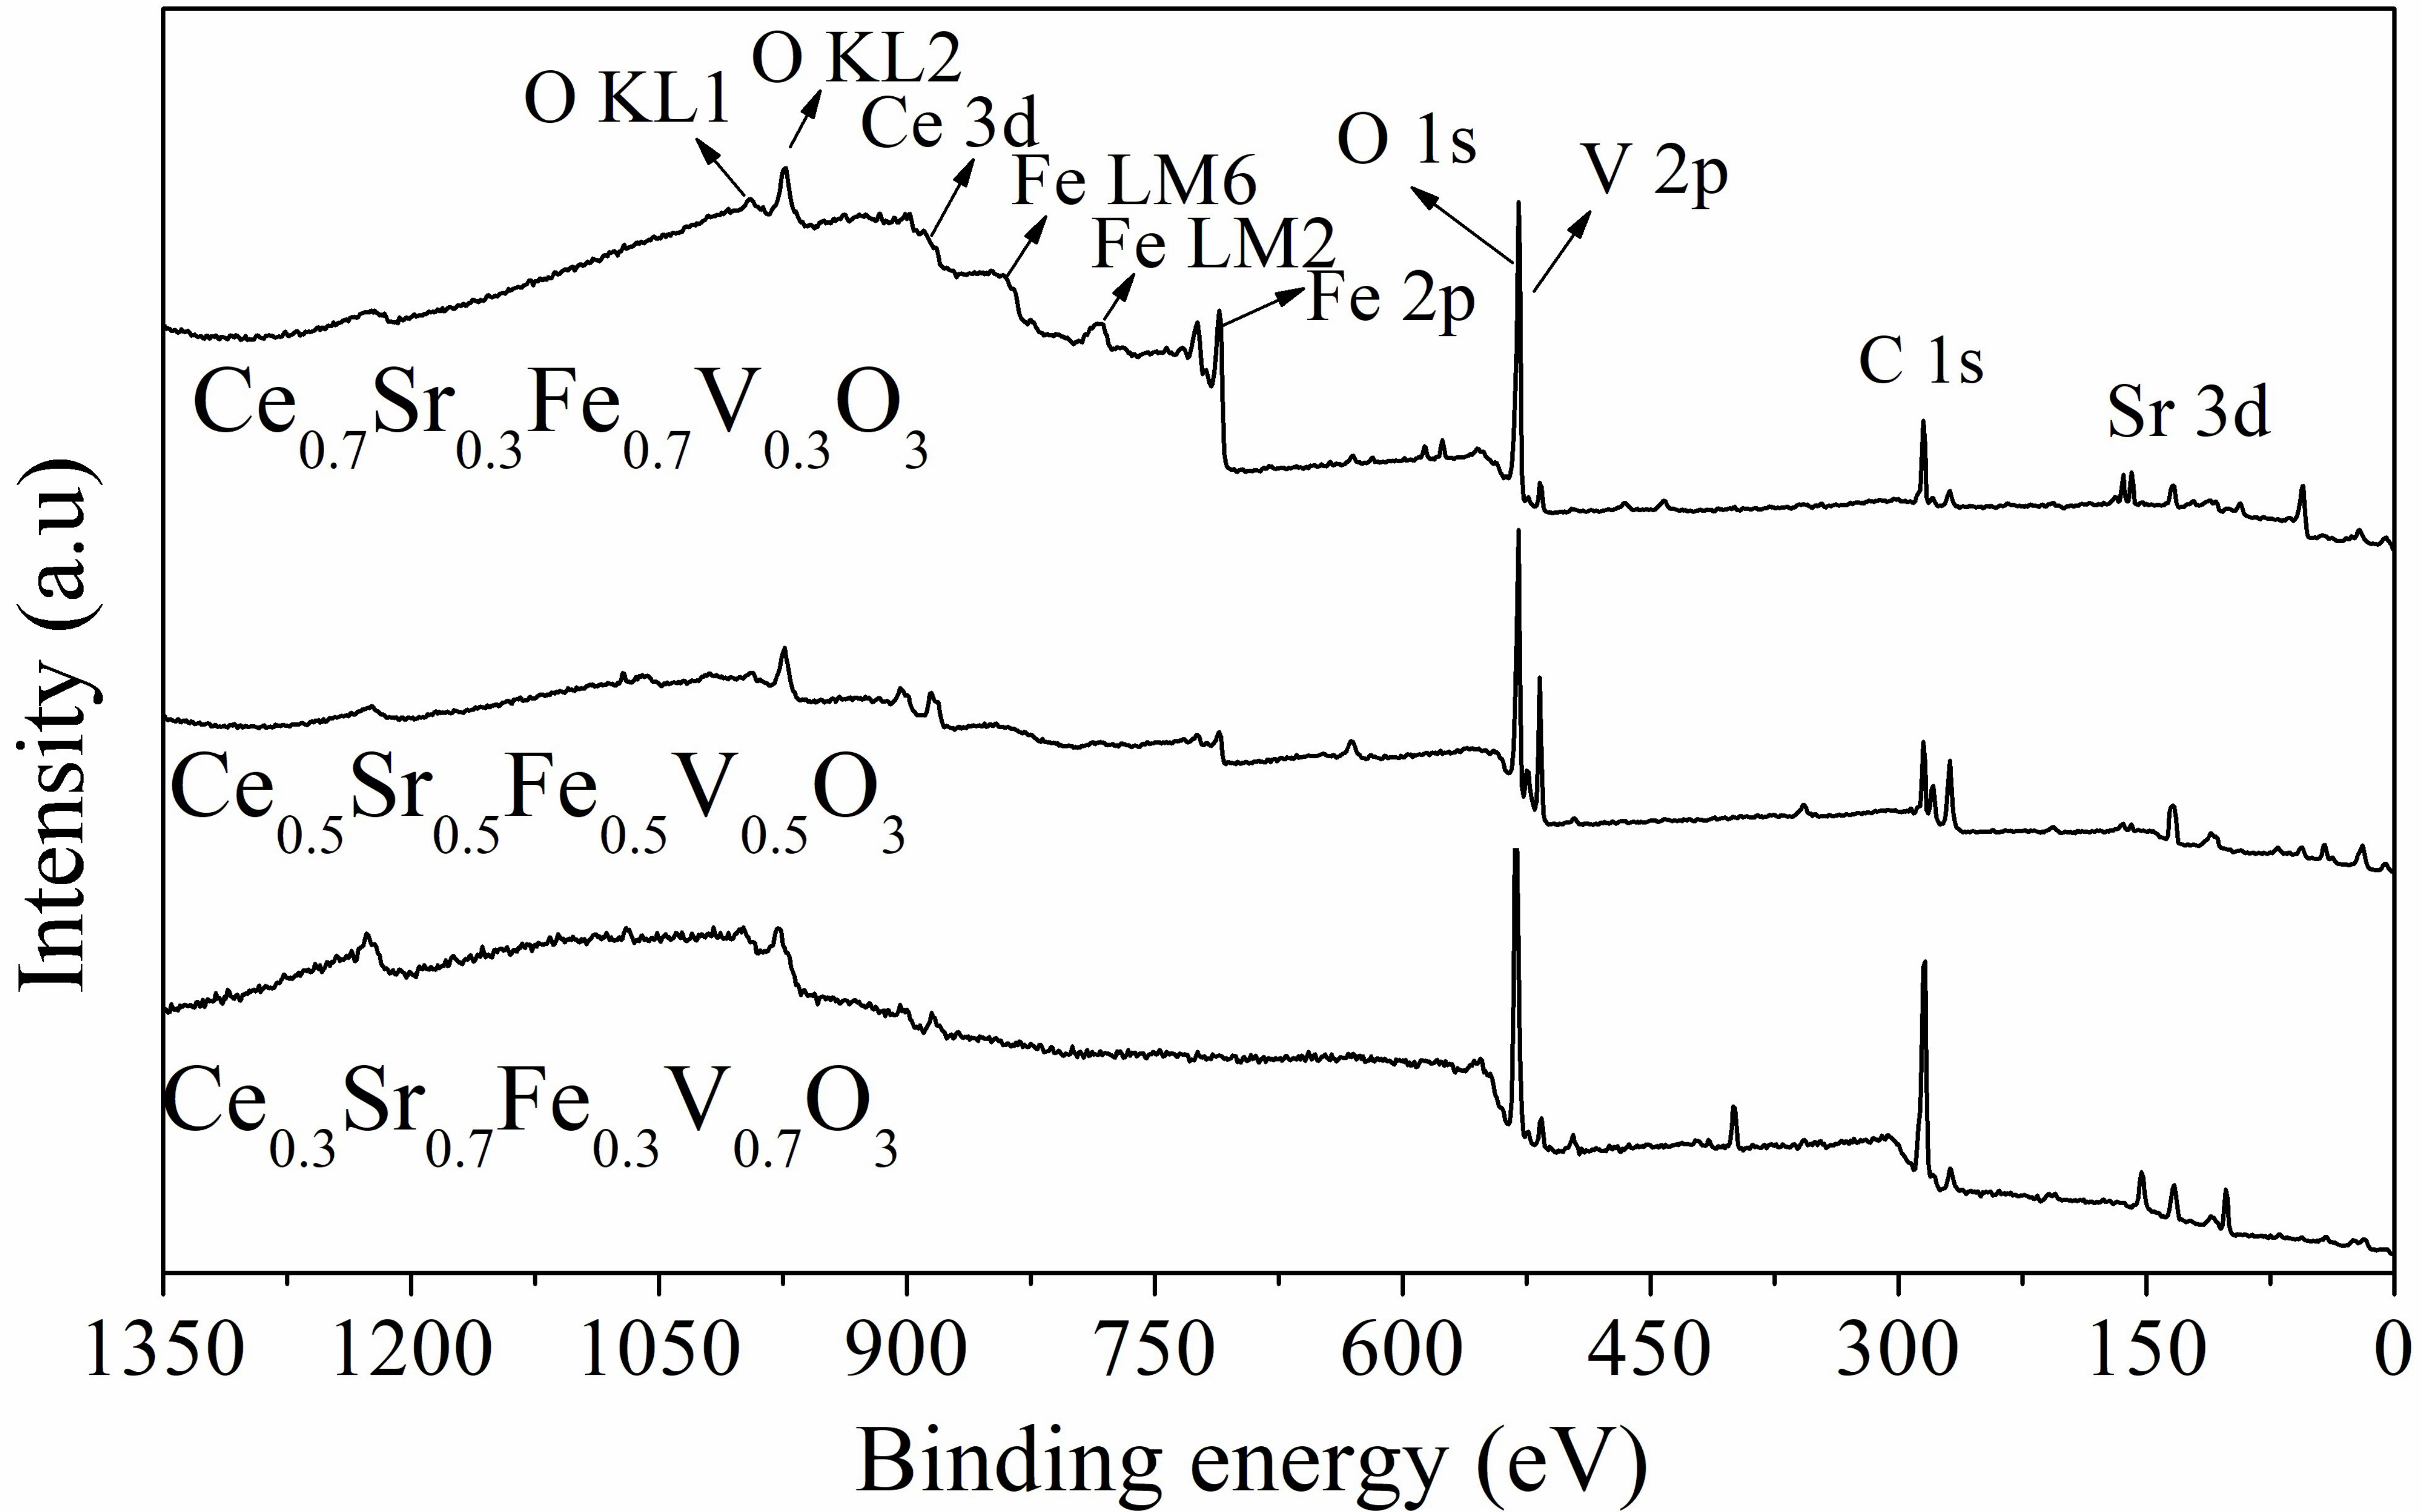

Supplement: c9dt04837e5.pdf [file c9dt04837e5.pdf]

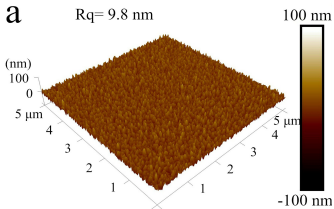

Supplement: c9dt04837e6.pdf [file c9dt04837e6.pdf]

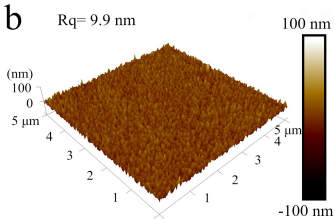

Supplement: c9dt04837e7.pdf [file c9dt04837e7.pdf]

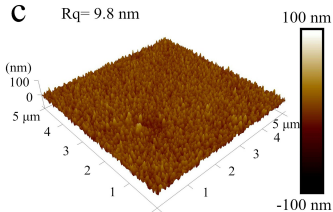

Supplement: c9dt04837e8.pdf [file c9dt04837e8.pdf]

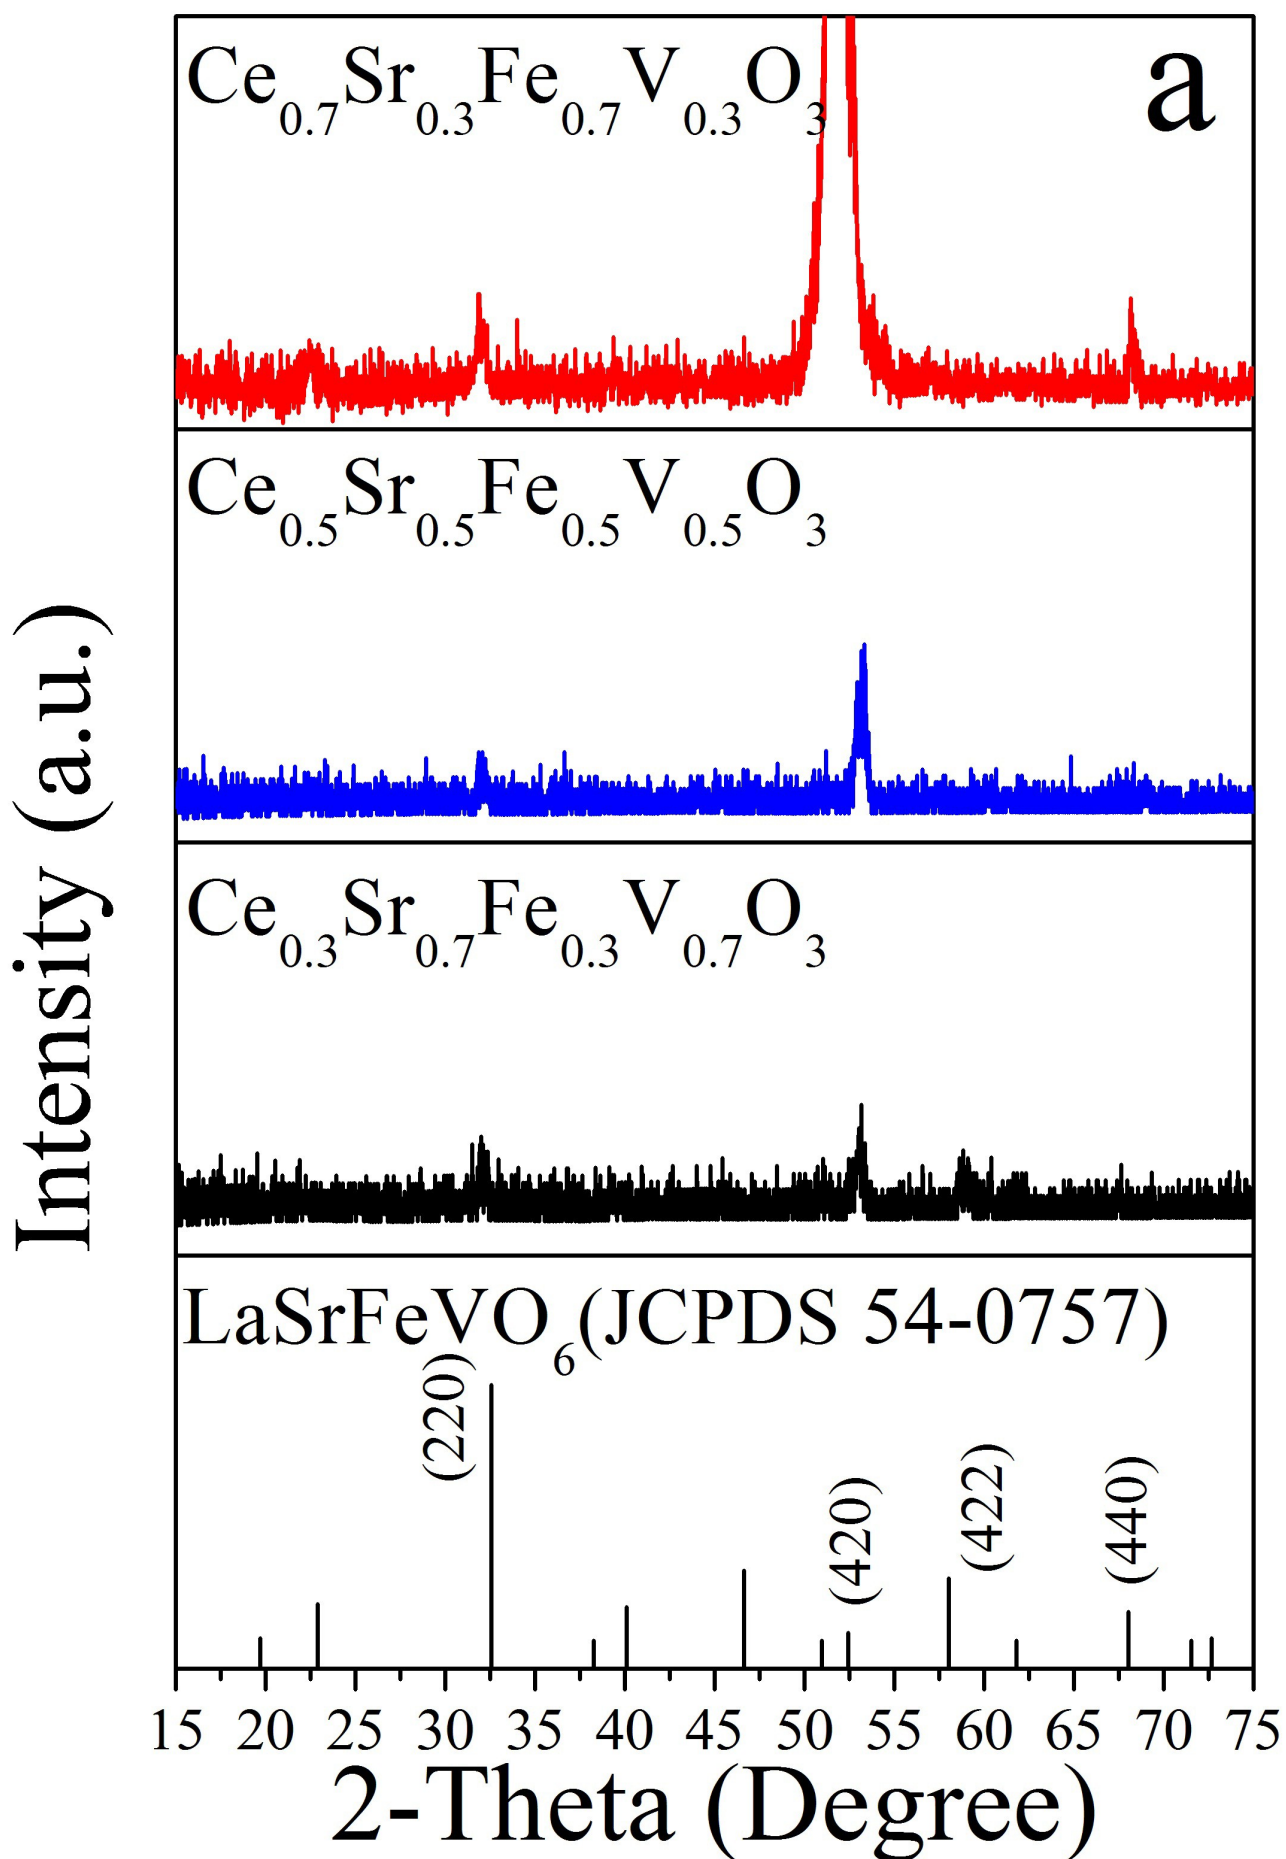

Supplement: c9dt04837e9.pdf [file c9dt04837e9.pdf]
